# Supplementary material
Source: PubMed Central journal article supplement (PMC6328771)
Supplement: AEM.02231-18-s0001.pdf [file AEM.02231-18-s0001.pdf]

## Supplementary information

**Table S1.** Predictions of cellular location and specificity of action for glucomannan and arabinoxylan degrading enzymes encoded by the genome of *C. pinensis*.

This list represents the theoretical potential for degradation of these polysaccharides by the bacterium, and also shows PULs that contain enzymes predicted to deconstruct mannan or xylan polysaccharides. The shaded rows describe predicted activity profiles for complete PULs.

| Predicted substrate                     | PUL range | Locus tag | Annotation         | Signal peptide? <sup>a</sup> | Predicted cellular location <sup>b</sup> | MW (kDa) <sup>c</sup> | Predicted activity <sup>d</sup>  |
|-----------------------------------------|-----------|-----------|--------------------|------------------------------|------------------------------------------|-----------------------|----------------------------------|
| Glucomannan; GOs; GMOs                  | -         | Cpin_0323 | GH3                | SpI                          | Periplasmic                              | 86.9                  | $\beta$ -glucosidase.            |
| Arabinoxylan; Arabinan; Arabinogalactan | 0353-0356 | Cpin_0353 | GH43 <sub>26</sub> | SpI                          | Extracellular                            | 39.0                  | $\alpha$ -L-arabinofuranosidase. |
|                                         |           | Cpin_0355 | SusD-like          | SpII                         | Lipoprotein                              | 70.7                  | Sugar binding                    |
|                                         |           | Cpin_0356 | SusC-like          | TM                           | Intrinsic membrane                       | 125.5                 | Sugar transport                  |
| XOs                                     | -         | Cpin_1751 | GH43 <sub>28</sub> | No                           | Unknown                                  | 66.1                  | $\beta$ -xylosidase.             |
| Arabinoxylan; AXOs                      | -         | Cpin_1805 | GH43 <sub>18</sub> | SpII                         | Lipoprotein                              | 34.6                  | $\alpha$ -L-arabinofuranosidase. |
| Glucomannan; GOs; GMOs                  | -         | Cpin_1816 | GH3                | SpI                          | Periplasmic/Extracellular                | 83.1                  | $\beta$ -glucosidase.            |
| Mannan                                  | -         | Cpin_2125 | GHnc; CBM13        | SpII                         | Lipoprotein                              | 53.9                  | Putative $\beta$ -mannanase.     |
| MOs                                     | -         | Cpin_2275 | GH2                | SpI                          | Extracellular                            | 98.9                  | $\beta$ -mannosidase.            |
| XOs                                     | -         | Cpin_2482 | GH43 <sub>33</sub> | SpI                          | Periplasmic                              | 43.2                  | $\beta$ -xylosidase.             |
| Glucomannan; MOs; GOs; GMOs             | 2857-2862 | Cpin_2857 | SusC-like          | TM                           | Intrinsic membrane                       | 128.1                 | Sugar transport                  |
|                                         |           | Cpin_2858 | SusD-like          | SpII                         | Lipoprotein                              | 72.5                  | Sugar binding                    |

| Predicted substrate             | PUL range     | Locus tag              | Annotation                    | Signal peptide? <sup>a</sup> | Predicted cellular location <sup>b</sup> | MW (kDa) <sup>c</sup> | Predicted activity <sup>d</sup>                                |
|---------------------------------|---------------|------------------------|-------------------------------|------------------------------|------------------------------------------|-----------------------|----------------------------------------------------------------|
|                                 |               | Cpin_2861              | GH2;<br>CBM32                 | SpI                          | Extracellular                            | 110.5                 | $\beta$ -mannosidase.                                          |
|                                 |               | Cpin_2862              | GH3                           | No                           | Periplasmic/Cytoplasmic membrane         | 83.4                  | $\beta$ -glucosidase.                                          |
| Xylan                           | -             | Cpin_2866              | GH43 <sub>34</sub> ;<br>CBM13 | SpII                         | Lipoprotein                              | 53.5                  | Xylanase.                                                      |
| Mannan; Chitin;<br>Chito-oligos | 3123-<br>3129 | Cpin_3123              | SusC-like                     | TM                           | Intrinsic membrane                       | 125.4                 | Sugar transport                                                |
|                                 |               | Cpin_3124              | SusD-like                     | SpII                         | Lipoprotein                              | 55.4                  | Sugar binding                                                  |
|                                 |               | Cpin_3125              | GH89                          | SpI                          | Extracellular                            | 83.0                  | $\alpha$ -N-acetylglucosaminidase.                             |
|                                 |               | Cpin_3128              | GT2; GH26                     | TM                           | Cytoplasmic membrane                     | 140.2                 | $\beta$ -mannanase.                                            |
|                                 |               | Cpin_3129              | GHnc                          | No                           | Unknown                                  | 50.1                  | Unknown.                                                       |
| XOs                             | -             | Cpin_3438              | GH43 <sub>19</sub>            | No                           | Unknown                                  | 35.9                  | $\beta$ -xylosidase.                                           |
| Xylan                           | -             | Cpin_4240              | GH10                          | No                           | Cytoplasmic                              | 37.3                  | <i>Endo</i> - $\beta$ -1,4-xylanase. <i>Probable fragment.</i> |
| Mannan                          | -             | Cpin_4289 <sup>d</sup> | GH5 <sub>n.c.</sub>           | SpII                         | Extracellular/ Lipoprotein (T9SS)        | 78.5                  | Putative $\beta$ -mannanase.                                   |
| Galactomannan;<br>Gal-MOs       | -             | Cpin_4392              | GH110                         | SpI                          | Extracellular                            | 65.9                  | $\alpha$ -galactosidase                                        |
| Arabinoxylan;<br>AXOs           | 4501-<br>4504 | Cpin_4501              | GH43 <sub>2</sub>             | SpI                          | Extracellular                            | 36.0                  | Arabinoxylan arabinofuranosidase.                              |
|                                 |               | Cpin_4503              | SusD-like                     | SpII                         | Lipoprotein                              | 69.5                  | Sugar binding                                                  |
|                                 |               | Cpin_4504              | SusC-like                     | TM                           | Intrinsic membrane                       | 119.2                 | Sugar transport                                                |

| Predicted substrate                                 | PUL range     | Locus tag | Annotation         | Signal peptide? <sup>a</sup> | Predicted cellular location <sup>b</sup> | MW (kDa) <sup>c</sup> | Predicted activity <sup>d</sup>    |
|-----------------------------------------------------|---------------|-----------|--------------------|------------------------------|------------------------------------------|-----------------------|------------------------------------|
| Xyloglucan;<br>Xylan;<br>Galactose-oligos           | 4556-<br>4559 | Cpin_4556 | GH35;<br>CBM32     | SpI                          | Extracellular                            | 68.9                  | $\beta$ -galactosidase.            |
|                                                     |               | Cpin_4557 | GH30 <sub>4</sub>  | SpI                          | Extracellular                            | 54.6                  | Xylanase or $\beta$ -fucosidase.   |
|                                                     |               | Cpin_4558 | SusD-like          | SpII                         | Lipoprotein                              | 62.4                  | Sugar binding                      |
|                                                     |               | Cpin_4559 | SusC-like          | TM                           | Intrinsic membrane                       | 112.6                 | Sugar transport                    |
| MOs                                                 | -             | Cpin_4811 | GH2;<br>CBM32      | SpI                          | Extracellular                            | 108.7                 | $\beta$ -mannosidase.              |
| Glucuronoxyylan;<br>Xyloglucan;<br>Galactose-oligos | 4843-<br>4849 | Cpin_4843 | GH35               | TMH                          | Cytoplasmic membrane                     | 103.5                 | $\beta$ -galactosidase.            |
|                                                     |               | Cpin_4845 | GH115              | SpI                          | Extracellular                            | 94.1                  | Xylan $\alpha$ -1,2-glucuronidase. |
|                                                     |               | Cpin_4846 | GH43 <sub>1</sub>  | SpI                          | Extracellular                            | 41.4                  | $\beta$ -xylosidase.               |
|                                                     |               | Cpin_4848 | SusD-like          | SpII                         | Lipoprotein                              | 57.8                  | Sugar binding                      |
|                                                     |               | Cpin_4849 | SusC-like          | TM                           | Intrinsic membrane                       | 114.0                 | Sugar transport                    |
| XOs                                                 | -             | Cpin_5150 | GH39               | SpI                          | Extracellular                            | 63.4                  | $\beta$ -xylosidase.               |
| XOs                                                 | -             | Cpin_5511 | GH43 <sub>10</sub> | SpI                          | Periplasmic                              | 59.6                  | Xylosidase/arabinofuranosidase.    |
| Galactomannan;<br>Maltose                           | 5641-<br>5648 | Cpin_5642 | GH13 <sub>16</sub> | No                           | Cytoplasmic                              | 63.1                  | Trehalose synthase.                |
|                                                     |               | Cpin_5645 | GH36               | SpI                          | Extracellular                            | 82.9                  | $\alpha$ -galactosidase.           |
|                                                     |               | Cpin_5646 | GH36               | SpI                          | Extracellular                            | 74.9                  | $\alpha$ -galactosidase.           |
|                                                     |               | Cpin_5647 | SusD-like          | SpII                         | Lipoprotein                              | 58.6                  | Sugar binding                      |
|                                                     |               | Cpin_5648 | SusC-like          | TM                           | Intrinsic membrane                       | 115.4                 | Sugar transport                    |
| XOs                                                 | -             | Cpin_6022 | GH43 <sub>31</sub> | SpI                          | Extracellular                            | 35.1                  | $\beta$ -xylosidase.               |

| Predicted substrate | PUL range | Locus tag | Annotation        | Signal peptide? <sup>a</sup> | Predicted cellular location <sup>b</sup> | MW (kDa) <sup>c</sup> | Predicted activity <sup>d</sup> |
|---------------------|-----------|-----------|-------------------|------------------------------|------------------------------------------|-----------------------|---------------------------------|
| XOs                 | -         | Cpin_6044 | GH43 <sub>8</sub> | SpI/II                       | Non-cytoplasmic/Lipoprotein              | 55.9                  | $\beta$ -xylosidase.            |
| MOs                 | -         | Cpin_7055 | GH2               | No                           | Unknown                                  | 96.4                  | $\beta$ -mannosidase.           |
| XOs                 | -         | Cpin_7193 | GH39              | TM                           | Membrane                                 | 60.8                  | $\beta$ -xylosidase.            |

<sup>a</sup>Prediction made using SignalP and LipoP. Key to signal peptides: SpI signal peptide, protein is likely secreted; SpII lipoprotein signal peptide, protein is likely membrane-anchored; TM: protein is predicted to contain a trans-membrane domain; No, no signal peptide, protein is likely cytoplasmic. <sup>b</sup>Prediction made using PSORTb and signal peptide prediction. The presence of a C-terminal domain belonging to TIGRFam family TIGR04183 was also used as an indicator of protein secretion. This domain signifies that a protein is secreted via the Type IX Secretion System (T9SS). For more details on this secretion system, we refer the reader to a recent review by Lasica *et al* (2017). <sup>c</sup>Full-length protein, including all domains and any signal peptides. <sup>d</sup>Predicted activity of the GH domain only. Predictions of enzyme activity based on the typical activity of members of that GH family/sub-family or, where possible, BLAST-identified sequence homology with characterised enzymes from other organisms. On the CAZy database, certain families are divided into sub-families for improved classification: if applicable, these are given in subscript.

**Table S2.** Predictions of cellular location and specificity of action for  $\beta$ -glucan degrading enzymes encoded by the genome of *C. pinensis*. This list represents the theoretical potential for degradation of  $\beta$ -glucans encoded by the genome, and also shows PULs that contain predicted  $\beta$ -glucan degrading enzymes. The shaded rows describe predicted activity profiles for complete PULs. In our model of  $\beta$ -glucan metabolism, we have excluded those enzymes and PULs that were shown in our previous proteomic work to specifically be induced only in the presence of  $\beta$ -mannan polysaccharides. We have also excluded those enzymes and PULs that were not detected in cultures grown on glucose.

| Predicted substrate                               | PUL range | Locus tag | Annotation                   | Signal peptide? <sup>a</sup> | Predicted cellular location <sup>b</sup> | MW (kDa) <sup>c</sup> | Predicted activity <sup>d</sup>       | Proteomic evidence <sup>e</sup>   | Included in model? |
|---------------------------------------------------|-----------|-----------|------------------------------|------------------------------|------------------------------------------|-----------------------|---------------------------------------|-----------------------------------|--------------------|
| GOs                                               | -         | Cpin_0323 | GH3                          | SpI                          | Periplasmic                              | 86.9                  | $\beta$ -glucosidase.                 | Not detected                      | No                 |
| GOs                                               | -         | Cpin_1816 | GH3                          | SpI                          | Periplasmic/Extracellular                | 83.1                  | $\beta$ -glucosidase.                 | Not detected                      | No                 |
| $\beta$ -(1 $\rightarrow$ 4)-D-glucans            | -         | Cpin_2009 | GH5 <sub>2</sub> ;<br>CBM32  | SpI                          | Extracellular (T9SS)                     | 81.2                  | <i>Endo</i> - $\beta$ -1,4-glucanase. | Detected                          | Yes                |
| Chitin;<br>$\beta$ -(1 $\rightarrow$ 3)-D-glucans | 2184-2192 | Cpin_2184 | GH18; GH18;<br>CBM5;<br>CBM5 | SpI                          | Extracellular (T9SS)                     | 144.6                 | Chitinase.                            | PUL detected via 2184, 2186, 2187 | Yes                |
|                                                   |           | Cpin_2186 | GH18; CBM6                   | SpI                          | Extracellular (T9SS)                     | 57.2                  | Chitinase.                            |                                   |                    |
|                                                   |           | Cpin_2187 | GH16; CBM6                   | SpI                          | Extracellular                            | 42.4                  | <i>Endo</i> - $\beta$ -1,3-glucanase. |                                   |                    |
|                                                   |           | Cpin_2191 | SusC-like                    | TM                           | Intrinsic membrane                       | 135.5                 | Sugar transport                       |                                   |                    |
|                                                   |           | Cpin_2192 | SusD-like                    | SpII                         | Lipoprotein                              | 54.7                  | Sugar binding                         |                                   |                    |
| $\beta$ -(1 $\rightarrow$ 3)-D-glucans            | -         | Cpin_2796 | GH81;CBM32                   | SpI                          | Extracellular (T9SS)                     | 124.8                 | <i>Endo</i> - $\beta$ -1,3-glucanase. | Mannan only                       | No                 |
| GOs; MOs; GMOs                                    | 2845-2856 | Cpin_2857 | SusC-like                    | TM                           | Intrinsic membrane                       | 128.1                 | Sugar transport                       | Not detected                      | No                 |
|                                                   |           | Cpin_2858 | SusD-like                    | SpII                         | Lipoprotein                              | 72.5                  | Sugar binding                         |                                   |                    |
|                                                   |           | Cpin_2861 | GH2; CBM32                   | SpI                          | Extracellular                            | 110.5                 | $\beta$ -mannosidase.                 |                                   |                    |

| Predicted substrate       | PUL range | Locus tag | Annotation         | Signal peptide? <sup>a</sup> | Predicted cellular location <sup>b</sup> | MW (kDa) <sup>c</sup> | Predicted activity <sup>d</sup>       | Proteomic evidence <sup>e</sup>   | Included in model?    |
|---------------------------|-----------|-----------|--------------------|------------------------------|------------------------------------------|-----------------------|---------------------------------------|-----------------------------------|-----------------------|
|                           |           | Cpin_2862 | GH3                | No                           | Periplasmic/Cytoplasmic membrane         | 83.4                  | $\beta$ -glucosidase.                 |                                   |                       |
| $\beta$ -(1→3)-D-glucans  | -         | Cpin_3536 | GH64; CBM6         | SpI                          | Extracellular (T9SS)                     | 77.8                  | <i>Endo</i> - $\beta$ -1,3-glucanase. | Detected                          | Yes                   |
| $\beta$ -(1→6)-D-glucans  | 3588-3590 | Cpin_3588 | SusC-like          | TM                           | Intrinsic membrane                       | 108.8                 | Sugar transport                       | Not detected                      | No                    |
|                           |           | Cpin_3589 | SusD-like          | SpII                         | Lipoprotein                              | 54.3                  | Sugar binding                         |                                   |                       |
|                           |           | Cpin_3590 | GH30 <sub>3</sub>  | SpII                         | Lipoprotein                              | 53.2                  | <i>Endo</i> - $\beta$ -1,6-glucanase. |                                   |                       |
| $\beta$ -(1→6)-D-glucans  | -         | Cpin_4356 | GH30 <sub>3</sub>  | SpII                         | Extracellular/<br>Lipoprotein            | 64.6                  | <i>Endo</i> - $\beta$ -1,6-glucanase. | Mannan only                       | Yes                   |
| $\beta$ -(1→3)-D-glucans  | 5109-5117 | Cpin_5109 | GH16               | SpII                         | Extracellular/<br>Lipoprotein            | 44.2                  | <i>Endo</i> - $\beta$ -1,3-glucanase. | PUL detected via 5109, 5116, 5117 | Yes                   |
|                           |           | Cpin_5113 | SusC-like          | TM                           | Intrinsic membrane                       | 120.6                 | Sugar transport                       |                                   |                       |
|                           |           | Cpin_5114 | SusD-like          | SpII                         | Lipoprotein                              | 53.5                  | Sugar binding                         |                                   |                       |
|                           |           | Cpin_5116 | GH16;<br>CBM32     | SpI                          | Extracellular (T9SS)                     | 115.5                 | Licheninase                           |                                   |                       |
|                           |           | Cpin_5117 | CBM6;<br>CBM6      | SpI                          | Extracellular (T9SS)                     | 122.6                 | Glucan/xylan binding.                 |                                   |                       |
| $\beta$ -(1→3)-D-glucans  | -         | Cpin_5709 | GH55               | SpII                         | Lipoprotein                              | 79.3                  | <i>Endo</i> - $\beta$ -1,3-glucanase. | Not detected                      | No                    |
| $\beta$ -(1→4)-D-glucans  | -         | Cpin_6252 | GH5 <sub>38</sub>  | SpI                          | Extracellular                            | 42.7                  | <i>Endo</i> - $\beta$ -1,4-glucanase. | Not detected                      | No                    |
| $\beta$ -(1→6)-D-glucans; | 6730-6742 | Cpin_6730 | GH43 <sub>34</sub> | SpI                          | Extracellular                            | 36.5                  | Arabinan arabinofuranosidase.         | PUL detected                      | Yes, except Cpin_6730 |
|                           |           | Cpin_6733 | SusC-like          | TM                           | Intrinsic membrane                       | 118.8                 | Sugar transport                       |                                   |                       |

| Predicted substrate          | PUL range | Locus tag | Annotation        | Signal peptide? <sup>a</sup> | Predicted cellular location <sup>b</sup> | MW (kDa) <sup>c</sup> | Predicted activity <sup>d</sup> | Proteomic evidence <sup>e</sup> | Included in model? |
|------------------------------|-----------|-----------|-------------------|------------------------------|------------------------------------------|-----------------------|---------------------------------|---------------------------------|--------------------|
| β-(1→3)-D-glucans; AXOs; GOs |           | Cpin_6734 | SusD-like         | SpII                         | Lipoprotein                              | 59.9                  | Sugar binding                   | via 6739, 6740                  |                    |
|                              |           | Cpin_6735 | GH30 <sub>1</sub> | SpI                          | Extracellular                            | 54.6                  | β-glucosidase.                  |                                 |                    |
|                              |           | Cpin_6736 | GH30 <sub>3</sub> | SpII                         | Extracellular/<br>Lipoprotein            | 52.6                  | <i>Endo</i> -β-1,6-glucanase.   |                                 |                    |
|                              |           | Cpin_6737 | GH16              | SpII                         | Lipoprotein                              | 32.1                  | <i>Endo</i> -β-1,3-glucanase.   |                                 |                    |
|                              |           | Cpin_6739 | SusD-like         | SpII                         | Lipoprotein                              | 56.3                  | Sugar binding                   |                                 |                    |
|                              |           | Cpin_6740 | SusC-like         | TM                           | Intrinsic membrane                       | 121.6                 | Sugar transport                 |                                 |                    |
| β-(1→4)-D-glucans; MOs       | 6806-6816 | Cpin_6806 | GH29              | SpI                          | Cytoplasmic                              | 52.4                  | α-fucosidase.                   | Not detected                    | No                 |
|                              |           | Cpin_6807 | SusD-like         | SpII                         | Lipoprotein                              | 46.6                  | Sugar binding                   |                                 |                    |
|                              |           | Cpin_6808 | SusC-like         | TM                           | Intrinsic membrane                       | 112.8                 | Sugar transport                 |                                 |                    |
|                              |           | Cpin_6813 | GH9; CE4          | SpI                          | Extracellular                            | 92                    | <i>Endo</i> -β-1,4-glucanase.   |                                 |                    |
|                              |           | Cpin_6816 | GH92              | SpI/II                       | Extracellular<br>/Lipoprotein            | 87.2                  | α-mannosidase.                  |                                 |                    |

<sup>a</sup>Prediction made using SignalP and LipoP. Key to signal peptides: SpI signal peptide, protein is likely secreted; SpII lipoprotein signal peptide, protein is likely membrane-anchored; TM: protein is predicted to contain a trans-membrane domain; No, no signal peptide, protein is likely cytoplasmic. <sup>b</sup>Prediction made using PSORTb and signal peptide prediction. The presence of a C-terminal domain belonging to TIGRFam family TIGR04183 was also used as an indicator of protein secretion. This domain signifies that a protein is secreted via the Type IX Secretion System (T9SS). For more details on this secretion system, we refer the reader to a recent review by Lasica *et al* (2017). <sup>c</sup>Full-length protein, including all domains and any signal peptides. <sup>d</sup>Predicted activity of the GH domain only. Predictions of enzyme activity based on the typical activity of members of that GH family/sub-family or, where possible, BLAST-identified sequence homology with characterised enzymes from other organisms. On the CAZy database, certain families are divided into sub-families for improved classification: if applicable, these are given in subscript. <sup>e</sup>Some proteins or PULs were detected in a previous proteomic analysis of secretomes.

**Table S3.** Structural analysis of  $\beta$ -glucan polysaccharides extracted from *Agaricus bisporus* fruiting bodies. To quantify monosaccharides, the polysaccharides were subjected to total acid hydrolysis (2 M TFA, 120 °C, 3 h), reduction (NaBH<sub>4</sub>) and acetylation, prior to analysis by GC-MS. For linkage analysis, polysaccharides were subjected to methylation, total acid hydrolysis, reduction (NaBD<sub>4</sub>) and acetylation, before again being analysed by GC-MS.

| <b>Partially O-methylated alditol acetates</b> | <b><i>Ab</i> glucan</b> | <b>Linkage type<sup>a</sup></b> |
|------------------------------------------------|-------------------------|---------------------------------|
| 2,3,4,6-Me <sub>4</sub> -Glc                   | 1.2                     | Glc <sub>p</sub> -(1→           |
| 2,4,6-Me <sub>3</sub> -Glc                     | -                       | →3)-Glc <sub>p</sub> -(1→       |
| 2,3,4-Me <sub>3</sub> -Glc                     | 98.8                    | →6)-Glc <sub>p</sub> -(1→       |
| 2,4-Me <sub>2</sub> -Glc                       | -                       | →3,6)-Glc <sub>p</sub> -(1→     |

<sup>a</sup> Based on derived *O*-methylalditol acetates.



**Table S4 a-d.** Full data from reducing sugar assays performed on secretomes of *C. pinensis* collected after growth on different types of biomass (presented as histograms in Figure 1 in the main manuscript). Activity is expressed in U/mg protein. Errors (one standard deviation; n = 3) are given in brackets. n.a., no activity detected.

| <b>Table S4 a: Day 0</b> | <b>Growth substrate</b>                           |                                                   |                                                   |
|--------------------------|---------------------------------------------------|---------------------------------------------------|---------------------------------------------------|
| <b>Assay substrate</b>   | <b>Glucose</b>                                    | <b>Spruce wood</b>                                | <b>Fungal fruiting body</b>                       |
| Avicel                   | 2.45 X 10 <sup>-2</sup> (4.2 X 10 <sup>-3</sup> ) | 8.34 X 10 <sup>-2</sup> (1.4 X 10 <sup>-2</sup> ) | 1.02 X 10 <sup>-2</sup> (1.4 X 10 <sup>-3</sup> ) |
| Carboxymethylcellulose   | n.a.                                              | 4.51 X 10 <sup>-2</sup> (8.5 X 10 <sup>-3</sup> ) | n.a.                                              |
| Barley β-glucan (MLG)    | 9.85 X 10 <sup>-2</sup> (1.8 X 10 <sup>-2</sup> ) | 9.91 X 10 <sup>-2</sup> (2.0 X 10 <sup>-2</sup> ) | 1.24 X 10 <sup>-1</sup> (7.1 X 10 <sup>-3</sup> ) |
| <i>A.b</i> extract       | 9.27 X 10 <sup>-2</sup> (1.6 X 10 <sup>-2</sup> ) | 3.14 X 10 <sup>-1</sup> (4.2 X 10 <sup>-2</sup> ) | 1.61 X 10 <sup>-1</sup> (2.1 X 10 <sup>-2</sup> ) |
| Tamarind xyloglucan      | 1.14 X 10 <sup>-1</sup> (9.2 X 10 <sup>-3</sup> ) | 9.23 X 10 <sup>-2</sup> (2.8 X 10 <sup>-3</sup> ) | n.a.                                              |
| Curdlan                  | n.a.                                              | n.a.                                              | 6.44 X 10 <sup>-2</sup> (1.4 X 10 <sup>-2</sup> ) |
| Scleroglucan             | n.a.                                              | 8.48 X 10 <sup>-2</sup> (6.4 X 10 <sup>-3</sup> ) | 1.71 X 10 <sup>-1</sup> (2.8 X 10 <sup>-2</sup> ) |
| Lichenan                 | 4.16 X 10 <sup>-1</sup> (2.1 X 10 <sup>-2</sup> ) | 4.59 X 10 <sup>-1</sup> (6.4 X 10 <sup>-2</sup> ) | 1.01 X 10 <sup>-1</sup> (3.5 X 10 <sup>-2</sup> ) |
| Konjac glucomannan       | 3.11 X 10 <sup>-1</sup> (1.4 X 10 <sup>-2</sup> ) | 4.57 X 10 <sup>-1</sup> (4.2 X 10 <sup>-2</sup> ) | 4.07 X 10 <sup>-2</sup> (2.5 X 10 <sup>-2</sup> ) |
| Carob galactomannan      | 8.06 X 10 <sup>-2</sup> (4.2 X 10 <sup>-3</sup> ) | 8.05 X 10 <sup>-2</sup> (1.2 X 10 <sup>-2</sup> ) | 4.10 X 10 <sup>-2</sup> (4.2 X 10 <sup>-3</sup> ) |
| Wheat arabinoxylan       | 2.43 X 10 <sup>-1</sup> (3.5 X 10 <sup>-2</sup> ) | 1.72 X 10 <sup>-1</sup> (2.8 X 10 <sup>-2</sup> ) | n.a.                                              |
| Birch glucuronoxylan     | 3.27 X 10 <sup>-2</sup> (9.9 X 10 <sup>-3</sup> ) | 8.33 X 10 <sup>-2</sup> (9.9 X 10 <sup>-3</sup> ) | n.a.                                              |
| Larch arabinogalactan    | 8.21 X 10 <sup>-2</sup> (6.4 X 10 <sup>-3</sup> ) | 1.66 X 10 <sup>-1</sup> (7.1 X 10 <sup>-3</sup> ) | 9.27 X 10 <sup>-2</sup> (5.3 X 10 <sup>-3</sup> ) |
| Sugar beet arabinan      | n.a.                                              | 4.47 X 10 <sup>-2</sup> (8.5 X 10 <sup>-3</sup> ) | n.a.                                              |
| Chitin                   | 9.81 X 10 <sup>-2</sup> (2.8 X 10 <sup>-3</sup> ) | 2.75 X 10 <sup>-1</sup> (5.7 X 10 <sup>-2</sup> ) | 2.79 X 10 <sup>-1</sup> (4.9 X 10 <sup>-2</sup> ) |
| Chitosan                 | 4.33 X 10 <sup>-2</sup> (9.9 X 10 <sup>-3</sup> ) | 1.36 X 10 <sup>-1</sup> (4.9 X 10 <sup>-2</sup> ) | 6.22 X 10 <sup>-2</sup> (3.3 X 10 <sup>-2</sup> ) |

| <b>Table S4 b: Day 3</b> | <b>Growth substrate</b>                           |                                                   |                                                   |
|--------------------------|---------------------------------------------------|---------------------------------------------------|---------------------------------------------------|
| <b>Assay substrate</b>   | <b>Glucose</b>                                    | <b>Spruce wood</b>                                | <b>Fungal fruiting body</b>                       |
| Avicel                   | 1.11 X 10 <sup>-3</sup> (7.1 X 10 <sup>-5</sup> ) | 3.18 X 10 <sup>-1</sup> (5.7 X 10 <sup>-2</sup> ) | 1.50 X 10 <sup>-1</sup> (2.8 X 10 <sup>-2</sup> ) |
| Carboxymethylcellulose   | 2.24 X 10 <sup>-3</sup> (5.7 X 10 <sup>-4</sup> ) | n.a.                                              | 2.14 X 10 <sup>-1</sup> (5.7 X 10 <sup>-2</sup> ) |
| Barley β-glucan (MLG)    | 6.33 X 10 <sup>-3</sup> (8.5 X 10 <sup>-4</sup> ) | 1.16 X 10 <sup>-1</sup> (3.5 X 10 <sup>-2</sup> ) | 1.51 X 10 <sup>-4</sup> (4.1 X 10 <sup>-2</sup> ) |
| <i>A.b</i> extract       | 4.42 X 10 <sup>-3</sup> (1.3 X 10 <sup>-3</sup> ) | 4.55 X 10 <sup>-1</sup> (5.7 X 10 <sup>-2</sup> ) | 3.31 X 10 <sup>-1</sup> (2.8 X 10 <sup>-2</sup> ) |
| Tamarind xyloglucan      | 4.12 X 10 <sup>-4</sup> (2.9 X 10 <sup>-4</sup> ) | 1.34 X 10 <sup>-1</sup> (4.9 X 10 <sup>-2</sup> ) | 1.04 X 10 <sup>-2</sup> (7.1 X 10 <sup>-4</sup> ) |
| Curdlan                  | 4.58 X 10 <sup>-4</sup> (1.7 X 10 <sup>-4</sup> ) | n.a.                                              | 6.09 X 10 <sup>-2</sup> (1.8 X 10 <sup>-2</sup> ) |
| Scleroglucan             | 1.37 X 10 <sup>-4</sup> (8.8 X 10 <sup>-5</sup> ) | 7.01 X 10 <sup>-2</sup> (1.8 X 10 <sup>-2</sup> ) | 3.10 X 10 <sup>-2</sup> (1.9 X 10 <sup>-2</sup> ) |
| Lichenan                 | 1.84 X 10 <sup>-3</sup> (2.8 X 10 <sup>-4</sup> ) | 1.14 X 10 <sup>-1</sup> (3.5 X 10 <sup>-2</sup> ) | 4.07 X 10 <sup>-1</sup> (1.5 X 10 <sup>-1</sup> ) |
| Konjac glucomannan       | 3.72 X 10 <sup>-3</sup> (2.8 X 10 <sup>-4</sup> ) | 2.24 X 10 <sup>-1</sup> (4.2 X 10 <sup>-2</sup> ) | 1.08 X 10 <sup>-1</sup> (1.4 X 10 <sup>-2</sup> ) |
| Carob galactomannan      | 5.18 X 10 <sup>-2</sup> (3.3 X 10 <sup>-2</sup> ) | n.a.                                              | n.a.                                              |
| Wheat arabinoxylan       | 1.11 X 10 <sup>-4</sup> (7.8 X 10 <sup>-5</sup> ) | 1.01 X 10 <sup>-1</sup> (1.4 X 10 <sup>-2</sup> ) | 1.13 X 10 <sup>-2</sup> (4.9 X 10 <sup>-3</sup> ) |
| Birch glucuronoxylan     | 1.53 X 10 <sup>-4</sup> (1.1 X 10 <sup>-4</sup> ) | 1.45 X 10 <sup>-1</sup> (1.4 X 10 <sup>-2</sup> ) | 8.23 X 10 <sup>-3</sup> (4.8 X 10 <sup>-3</sup> ) |
| Larch arabinogalactan    | 8.00 X 10 <sup>-4</sup> (5.7 X 10 <sup>-4</sup> ) | 1.75 X 10 <sup>-1</sup> (1.4 X 10 <sup>-2</sup> ) | 5.50 X 10 <sup>-2</sup> (1.6 X 10 <sup>-2</sup> ) |
| Sugar beet arabinan      | n.a.                                              | 3.24 X 10 <sup>-2</sup> (1.8 X 10 <sup>-2</sup> ) | 7.53 X 10 <sup>-3</sup> (1.1 X 10 <sup>-3</sup> ) |
| Chitin                   | 1.74 X 10 <sup>-3</sup> (8.5 X 10 <sup>-4</sup> ) | 4.39 X 10 <sup>-1</sup> (2.8 X 10 <sup>-2</sup> ) | 1.71 X 10 <sup>-1</sup> (1.1 X 10 <sup>-1</sup> ) |
| Chitosan                 | 6.22 X 10 <sup>-3</sup> (3.1 X 10 <sup>-3</sup> ) | 9.38 X 10 <sup>-2</sup> (1.2 X 10 <sup>-2</sup> ) | 2.86 X 10 <sup>-2</sup> (2.1 X 10 <sup>-2</sup> ) |

| <b>Table S4 c: Day 5</b> | <b>Growth substrate</b>                           |                                                   |                                                   |
|--------------------------|---------------------------------------------------|---------------------------------------------------|---------------------------------------------------|
| <b>Assay substrate</b>   | <b>Glucose</b>                                    | <b>Spruce wood</b>                                | <b>Fungal fruiting body</b>                       |
| Avicel                   | 7.05 X 10 <sup>-4</sup> (5.0 X 10 <sup>-4</sup> ) | 1.56 X 10 <sup>-1</sup> (1.4 X 10 <sup>-2</sup> ) | 1.09 X 10 <sup>-2</sup> (5.7 X 10 <sup>-3</sup> ) |
| Carboxymethylcellulose   | 1.81 X 10 <sup>-3</sup> (2.8 X 10 <sup>-4</sup> ) | n.a.                                              | 4.31 X 10 <sup>-2</sup> (1.2 X 10 <sup>-2</sup> ) |
| Barley β-glucan (MLG)    | 6.42 X 10 <sup>-3</sup> (4.9 X 10 <sup>-4</sup> ) | n.a.                                              | 2.61 X 10 <sup>-1</sup> (3.5 X 10 <sup>-2</sup> ) |
| <i>A.b</i> extract       | 3.70 X 10 <sup>-3</sup> (8.5 X 10 <sup>-4</sup> ) | 3.81 X 10 <sup>-1</sup> (6.4 X 10 <sup>-2</sup> ) | 1.28 X 10 <sup>-1</sup> (4.2 X 10 <sup>-2</sup> ) |
| Tamarind xyloglucan      | 1.09 X 10 <sup>-3</sup> (7.1 X 10 <sup>-5</sup> ) | 1.93 X 10 <sup>-1</sup> (4.2 X 10 <sup>-2</sup> ) | 2.51 X 10 <sup>-3</sup> (1.6 X 10 <sup>-3</sup> ) |
| Curdlan                  | 4.64 X 10 <sup>-3</sup> (7.8 X 10 <sup>-4</sup> ) | n.a.                                              | 3.28 X 10 <sup>-2</sup> (1.1 X 10 <sup>-2</sup> ) |
| Scleroglucan             | 9.76 X 10 <sup>-4</sup> (3.4 X 10 <sup>-4</sup> ) | 2.27 X 10 <sup>-2</sup> (1.2 X 10 <sup>-2</sup> ) | 2.71 X 10 <sup>-2</sup> (4.2 X 10 <sup>-3</sup> ) |
| Lichenan                 | 5.41 X 10 <sup>-3</sup> (1.3 X 10 <sup>-3</sup> ) | 3.67 X 10 <sup>-1</sup> (1.3 X 10 <sup>-1</sup> ) | 7.59 X 10 <sup>-2</sup> (1.6 X 10 <sup>-2</sup> ) |
| Konjac glucomannan       | 3.61 X 10 <sup>-3</sup> (1.5 X 10 <sup>-3</sup> ) | 2.13 X 10 <sup>-1</sup> (7.8 X 10 <sup>-2</sup> ) | 3.18 X 10 <sup>-2</sup> (1.6 X 10 <sup>-2</sup> ) |
| Carob galactomannan      | 5.37 X 10 <sup>-4</sup> (3.8 X 10 <sup>-4</sup> ) | 5.12 X 10 <sup>-2</sup> (2.5 X 10 <sup>-5</sup> ) | 3.28 X 10 <sup>-3</sup> (8.5 X 10 <sup>-4</sup> ) |
| Wheat arabinoxylan       | 2.04 X 10 <sup>-3</sup> (2.1 X 10 <sup>-4</sup> ) | 1.52 X 10 <sup>-1</sup> (4.9 X 10 <sup>-2</sup> ) | 2.08 X 10 <sup>-3</sup> (9.9 X 10 <sup>-4</sup> ) |
| Birch glucuronoxylan     | 1.85 X 10 <sup>-4</sup> (1.3 X 10 <sup>-4</sup> ) | 5.02 X 10 <sup>-2</sup> (2.8 X 10 <sup>-2</sup> ) | n.a.                                              |
| Larch arabinogalactan    | 1.17 X 10 <sup>-3</sup> (2.1 X 10 <sup>-4</sup> ) | 2.05 X 10 <sup>-1</sup> (7.1 X 10 <sup>-2</sup> ) | 1.36 X 10 <sup>-2</sup> (3.5 X 10 <sup>-3</sup> ) |
| Sugar beet arabinan      | n.a.                                              | 4.88 X 10 <sup>-3</sup> (2.8 X 10 <sup>-3</sup> ) | n.a.                                              |
| Chitin                   | 1.99 X 10 <sup>-3</sup> (7.1 X 10 <sup>-4</sup> ) | 2.06 X 10 <sup>-1</sup> (8.9 X 10 <sup>-2</sup> ) | 5.54 X 10 <sup>-2</sup> (9.2 X 10 <sup>-3</sup> ) |
| Chitosan                 | n.a.                                              | 4.22 X 10 <sup>-2</sup> (2.3 X 10 <sup>-2</sup> ) | 1.38 X 10 <sup>-2</sup> (7.8 X 10 <sup>-3</sup> ) |

| <b>Table S4 d: Day 8</b> | <b>Growth substrate</b>                           |                                                   |                                                   |
|--------------------------|---------------------------------------------------|---------------------------------------------------|---------------------------------------------------|
| <b>Assay substrate</b>   | <b>Glucose</b>                                    | <b>Spruce wood</b>                                | <b>Fungal fruiting body</b>                       |
| Avicel                   | 8.74 X 10 <sup>-4</sup> (6.2 X 10 <sup>-4</sup> ) | 2.26 X 10 <sup>-2</sup> (3.5 X 10 <sup>-3</sup> ) | 2.26 X 10 <sup>-2</sup> (9.1 X 10 <sup>-3</sup> ) |
| Carboxymethylcellulose   | 1.11 X 10 <sup>-3</sup> (4.9 X 10 <sup>-4</sup> ) | 1.31 X 10 <sup>-1</sup> (4.2 X 10 <sup>-2</sup> ) | 1.31 X 10 <sup>-1</sup> (1.4 X 10 <sup>-2</sup> ) |
| Barley β-glucan (MLG)    | n.a.                                              | 6.35 X 10 <sup>-1</sup> (1.8 X 10 <sup>-1</sup> ) | 6.35 X 10 <sup>-1</sup> (3.5 X 10 <sup>-2</sup> ) |
| <i>A.b</i> extract       | 2.54 X 10 <sup>-3</sup> (7.8 X 10 <sup>-4</sup> ) | 1.45 X 10 <sup>-1</sup> (1.4 X 10 <sup>-2</sup> ) | 1.45 X 10 <sup>-1</sup> (2.1 X 10 <sup>-2</sup> ) |
| Tamarind xyloglucan      | n.a.                                              | n.a.                                              | n.a.                                              |
| Curdlan                  | 4.73 X 10 <sup>-4</sup> (3.3 X 10 <sup>-4</sup> ) | 7.41 X 10 <sup>-2</sup> (1.8 X 10 <sup>-2</sup> ) | 7.41 X 10 <sup>-2</sup> (1.1 X 10 <sup>-2</sup> ) |
| Scleroglucan             | 7.63 X 10 <sup>-4</sup> (5.4 X 10 <sup>-4</sup> ) | 2.79 X 10 <sup>-2</sup> (1.3 X 10 <sup>-2</sup> ) | 2.79 X 10 <sup>-2</sup> (9.2 X 10 <sup>-3</sup> ) |
| Lichenan                 | 2.25 X 10 <sup>-3</sup> (8.5 X 10 <sup>-4</sup> ) | 1.84 X 10 <sup>-1</sup> (1.1 X 10 <sup>-1</sup> ) | 1.84 X 10 <sup>-1</sup> (2.1 X 10 <sup>-2</sup> ) |
| Konjac glucomannan       | n.a.                                              | 9.54 X 10 <sup>-2</sup> (5.3 X 10 <sup>-3</sup> ) | 9.54 X 10 <sup>-2</sup> (1.3 X 10 <sup>-2</sup> ) |
| Carob galactomannan      | n.a.                                              | n.a.                                              | n.a.                                              |
| Wheat arabinoxylan       | n.a.                                              | n.a.                                              | n.a.                                              |
| Birch glucuronoxylan     | n.a.                                              | 1.28 X 10 <sup>-3</sup> (3.5 X 10 <sup>-4</sup> ) | 1.28 X 10 <sup>-3</sup> (2.1 X 10 <sup>-4</sup> ) |
| Larch arabinogalactan    | n.a.                                              | 1.45 X 10 <sup>-2</sup> (2.8 X 10 <sup>-3</sup> ) | 1.45 X 10 <sup>-2</sup> (4.2 X 10 <sup>-3</sup> ) |
| Sugar beet arabinan      | n.a.                                              | 3.31 X 10 <sup>-3</sup> (1.4 X 10 <sup>-4</sup> ) | 3.31 X 10 <sup>-3</sup> (2.1 X 10 <sup>-3</sup> ) |
| Chitin                   | 1.64 X 10 <sup>-3</sup> (8.5 X 10 <sup>-4</sup> ) | 6.49 X 10 <sup>-2</sup> (1.3 X 10 <sup>-2</sup> ) | 6.49 X 10 <sup>-2</sup> (2.4 X 10 <sup>-2</sup> ) |
| Chitosan                 | 8.18 X 10 <sup>-4</sup> (5.8 X 10 <sup>-4</sup> ) | 9.41 X 10 <sup>-3</sup> (4.2 X 10 <sup>-4</sup> ) | 9.41 X 10 <sup>-3</sup> (3.3 X 10 <sup>-3</sup> ) |

**Table S5.** Full data from reducing sugar assays performed on secretomes of *C. pinensis* collected after growth on isolated polysaccharides (presented as a histogram in Figure 2 in the main manuscript). Activity is expressed in U/mg protein. Errors (one standard deviation; n = 2) are given in brackets. n.a., no activity detected.

| Assay substrate        | Growth substrate |                                |                                 |                                 |                                 |                                 |                                 |                                 |
|------------------------|------------------|--------------------------------|---------------------------------|---------------------------------|---------------------------------|---------------------------------|---------------------------------|---------------------------------|
|                        | Glucose          | Carboxy-methylcellulose        | Barley $\beta$ -glucan          | <i>A.b</i> extract              | Curdlan                         | Scleroglucan                    | Konjac glucomannan              | Wheat arabinoxylan              |
| Barley $\beta$ -glucan | n.a.             | 0.38 (3.5 X 10 <sup>-2</sup> ) | 0.075 (1.8 X 10 <sup>-2</sup> ) | 0.041 (1.5 X 10 <sup>-3</sup> ) | 0.013 (5.9 X 10 <sup>-3</sup> ) | 0.055 (1.3 X 10 <sup>-2</sup> ) | 0.041 (1.6 X 10 <sup>-2</sup> ) | 0.073 (4.6 X 10 <sup>-3</sup> ) |
| Tamarind xyloglucan    | n.a.             | n.a.                           | 0.023 (8.0 X 10 <sup>-3</sup> ) | n.a.                            | n.a.                            | n.a.                            | 0.012 (3.6 X 10 <sup>-3</sup> ) | n.a.                            |
| Konjac glucomannan     | n.a.             | n.a.                           | n.a.                            | n.a.                            | n.a.                            | n.a.                            | 0.22 (3.6 X 10 <sup>-2</sup> )  | 0.023 (2.0 X 10 <sup>-3</sup> ) |
| Carob galactomannan    | n.a.             | n.a.                           | n.a.                            | n.a.                            | n.a.                            | n.a.                            | 0.17 (2.5 X 10 <sup>-2</sup> )  | n.a.                            |
| Wheat arabinoxylan     | n.a.             | n.a.                           | n.a.                            | n.a.                            | n.a.                            | n.a.                            | 0.046 (5.6 X 10 <sup>-3</sup> ) | 0.094 (2.8 X 10 <sup>-3</sup> ) |
| Birch glucuronoxylan   | n.a.             | n.a.                           | n.a.                            | n.a.                            | n.a.                            | n.a.                            | 0.023 (3.2 X 10 <sup>-3</sup> ) | 0.30 (1.8 X 10 <sup>-2</sup> )  |
| Larch arabinogalactan  | n.a.             | n.a.                           | n.a.                            | n.a.                            | n.a.                            | n.a.                            | n.a.                            | n.a.                            |
| Sugar beet arabinan    | n.a.             | n.a.                           | n.a.                            | n.a.                            | n.a.                            | n.a.                            | n.a.                            | n.a.                            |

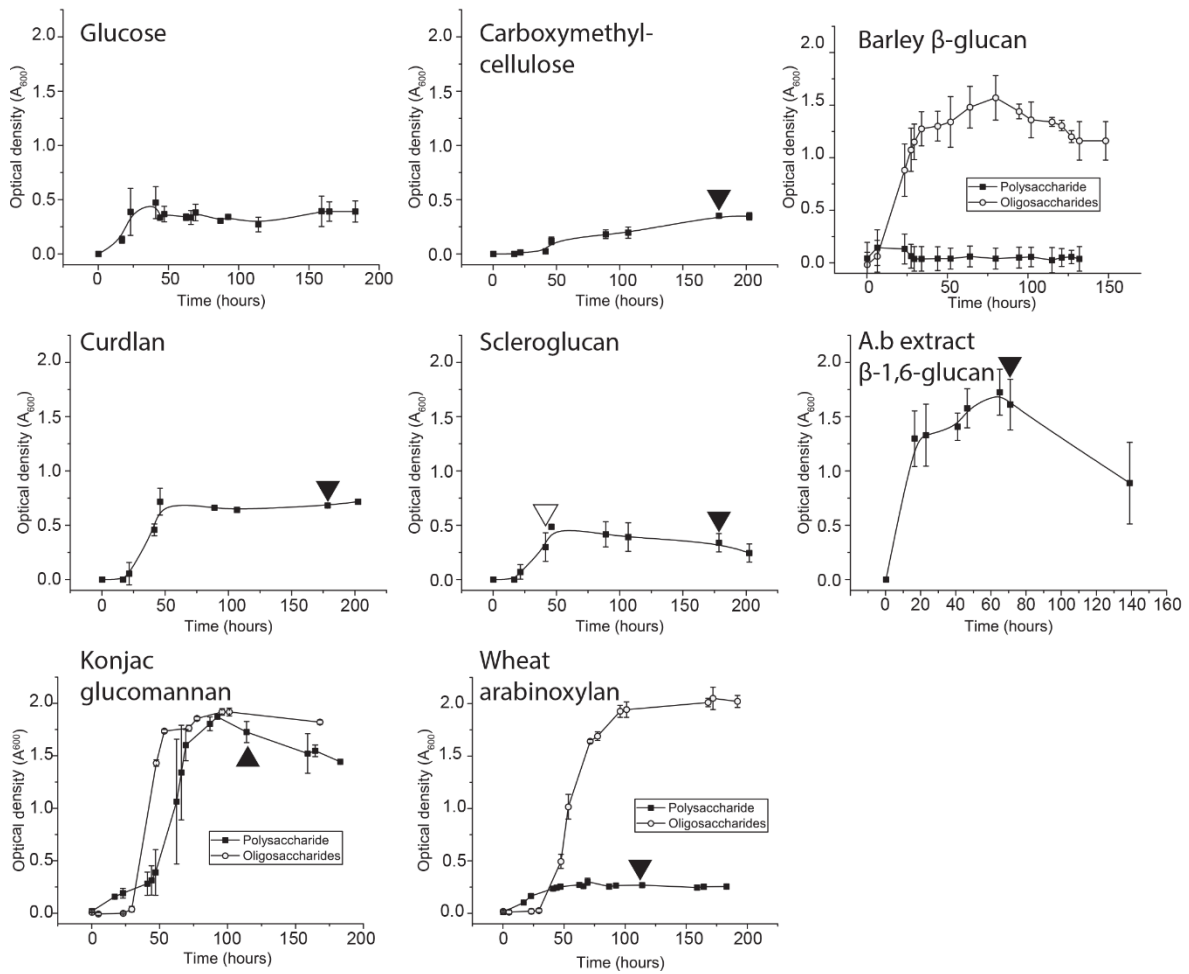

**Figure S1.** Growth curves for *C. pinensis* incubated with various isolated polysaccharides. Growth substrates are indicated on the graphs. A.b extract is a linear  $\beta$ -1,6-glucan we extracted from fungal fruiting body. Three biological replicate experiments were performed. Curves for growth on glucose, konjac glucomannan polysaccharide, and wheat arabinoxylan polysaccharide were previously published in McKee and Brumer, 2015. Filled arrow heads on the growth curves indicate the point at which oligosaccharide concentration in the medium was quantified. For the scleroglucan cultures, ESI-MS-based sequencing of residual oligosaccharides was performed at both indicated time-points (empty and filled arrow heads).

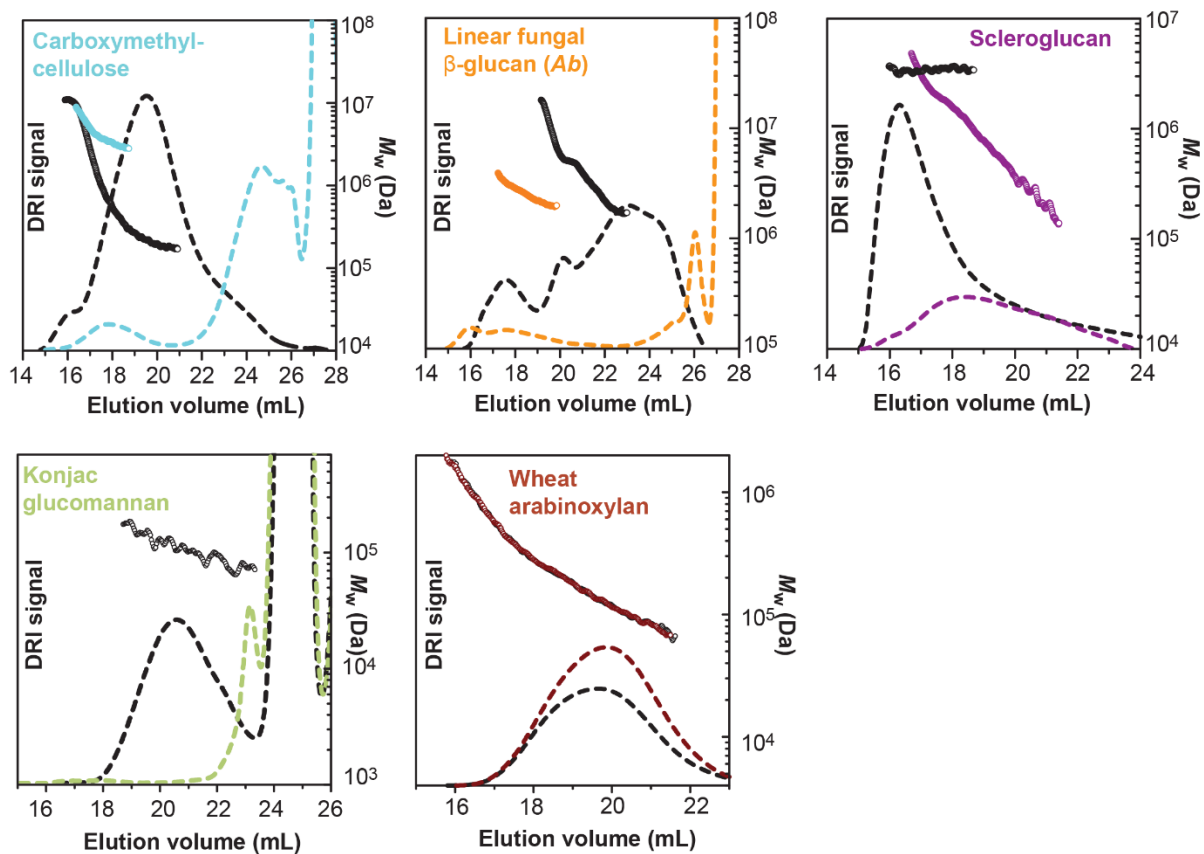

**Figure S2.** SEC-MALLS analysis of liquid medium in the early (black) and late (coloured) stages of bacterial growth. The differential refractive index (DRI) is a measure of peak homogeneity, and is used in combination with the SEC spectrum to calculate MW, taking polydispersity of MW into account. SEC spectra are shown in dashed lines, while DRI spectra are shown in solid colour.

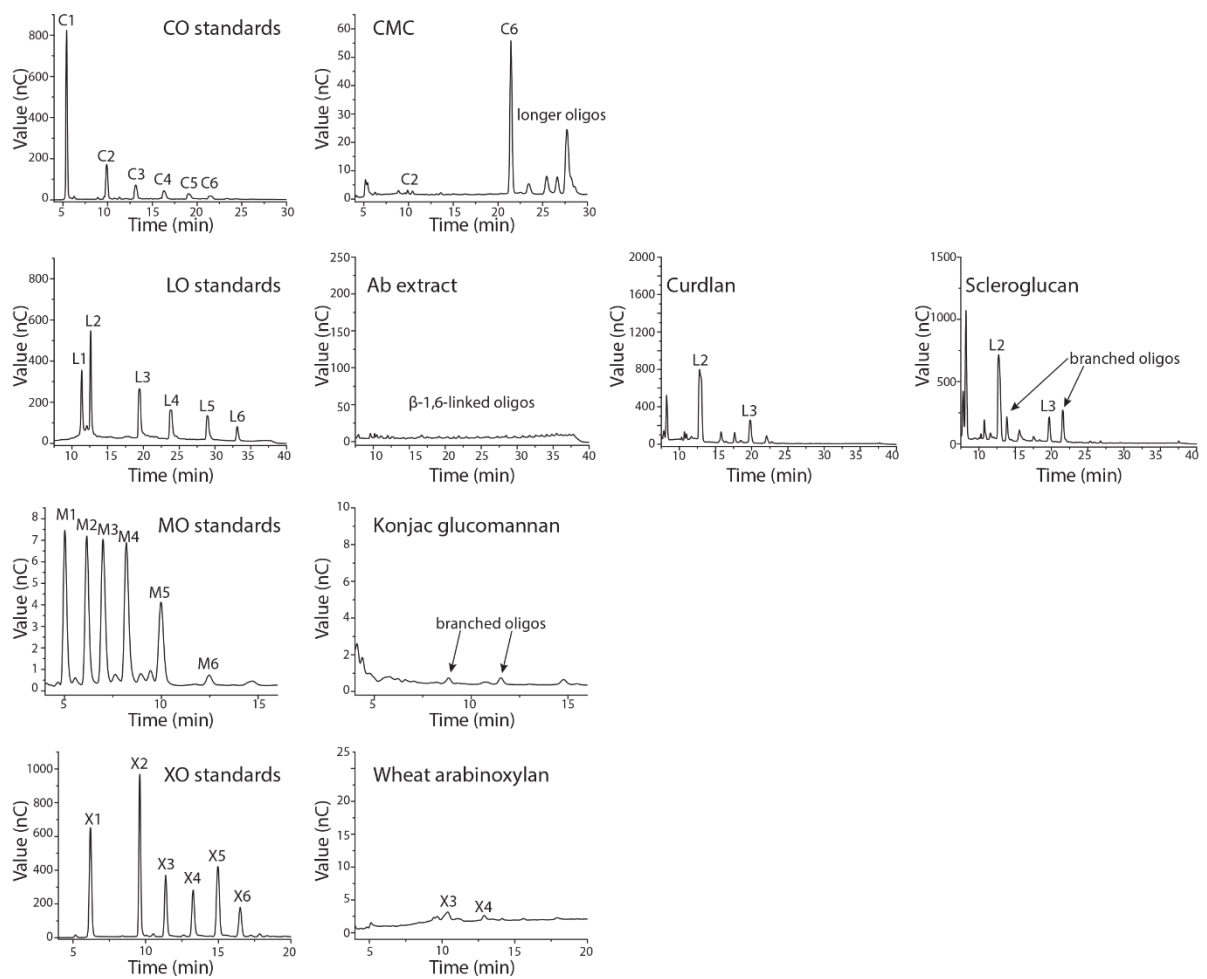

**Figure S3.** Representative sample chromatograms showing HPAEC-PAD analysis of oligosaccharides residual in growth media after cultivation of *C. pinensis* with the indicated polysaccharides. Oligosaccharides were identified wherever possible by comparing elution times with those of known standards, shown here in separate chromatograms. Oligosaccharides were quantified by comparing peak area to that of the most closely eluting standard of known concentration. CO: cellulose oligosaccharides. LO: laminarin oligosaccharides. MO: mannan oligosaccharides. XO: xylan oligosaccharides.



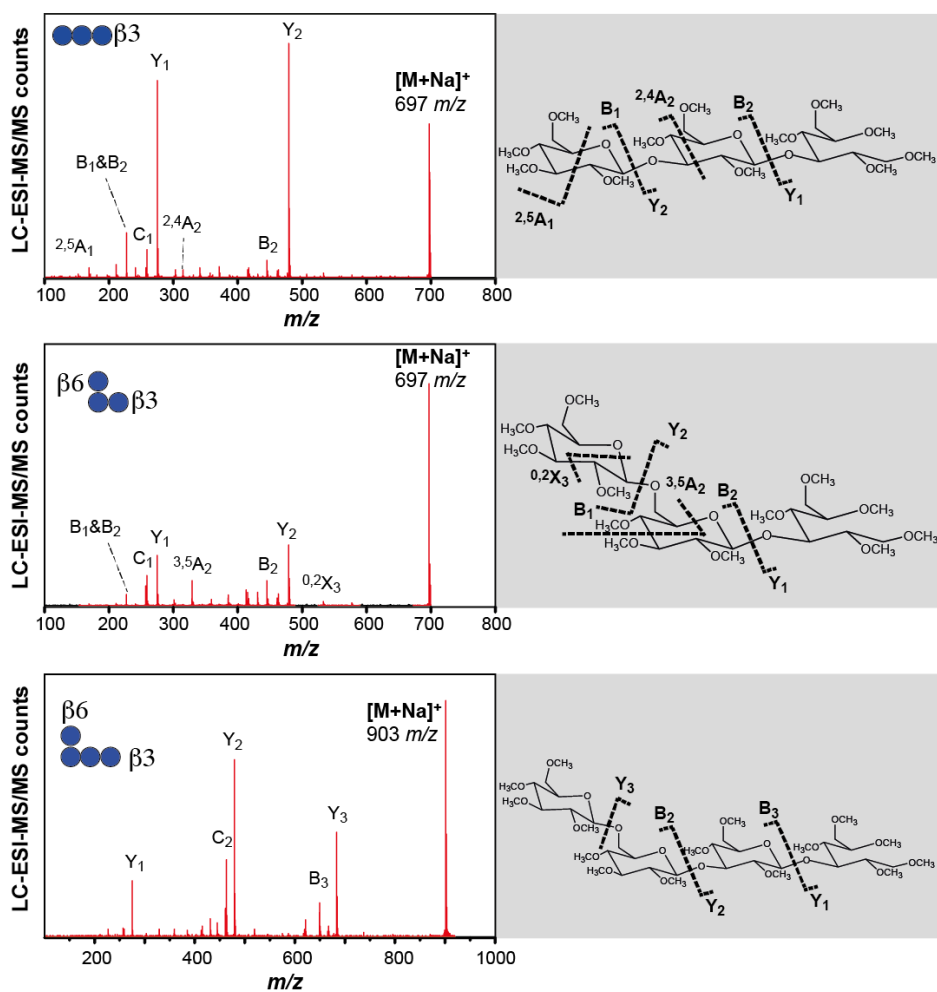

**Figure S4.** ESI-MS analysis of residual gluco-oligosaccharides (structures represented with blue circles) following deconstruction of scleroglucan in growth medium.

### Supplementary references

Lasica A.M., Ksiazek M., Madej M., Potempa J. 2017. The Type IX Secretion System (T9SS): Highlights and recent insights into its structure and function. *Frontiers in Cellular and Infection Microbiology* 7, 215.

McKee LS, Brumer H. 2015. Growth of *Chitinophaga pinensis* on plant cell wall glycans and characterisation of a glycoside hydrolase family 27  $\beta$ -L-arabinopyranosidase implicated in arabinogalactan utilisation. *PLoS One* 10:e0139932
